# Supplementary material for: Visible-light sensitized sol–gel-based lanthanide complexes (Sm, Yb, Nd, Er, Pr, Ho, Tm): microstructure, photoluminescence study, and thermostability
Source: Royal Society of Chemistry journal article supplement (doi:10.1039/c3ra45202f), 2013-01-01
Supplement: c3ra45202f.pdf [file c3ra45202f.pdf]

## Supporting information

### **Visible-light sensitized sol-gel-based lanthanide complexes (Sm, Yb, Nd, Er, Pr, Ho, Tm): microstructure, photoluminescence study, and thermostability**

**Lining Sun,<sup>\*a</sup> Yannan Qiu,<sup>a</sup> Tao Liu,<sup>a</sup> Hongshang Peng,<sup>b</sup> Wei Deng,<sup>a</sup> Zhijuan Wang,<sup>a</sup> and Liyi Shi<sup>\*a</sup>**

<sup>a</sup> *Research Center of Nano Science and Technology and Department of Chemistry, Shanghai University, Shanghai 200444, P. R. China. E-mail: linsun@shu.edu.cn (L. N. Sun); shiliyi@shu.edu.cn (L. Y. Shi)*

<sup>b</sup> *Key Laboratory of Luminescence and Optical Information Ministry of Education, Institute of Optoelectronic Technology, Beijing Jiaotong University, Beijing 100044, P. R. China*

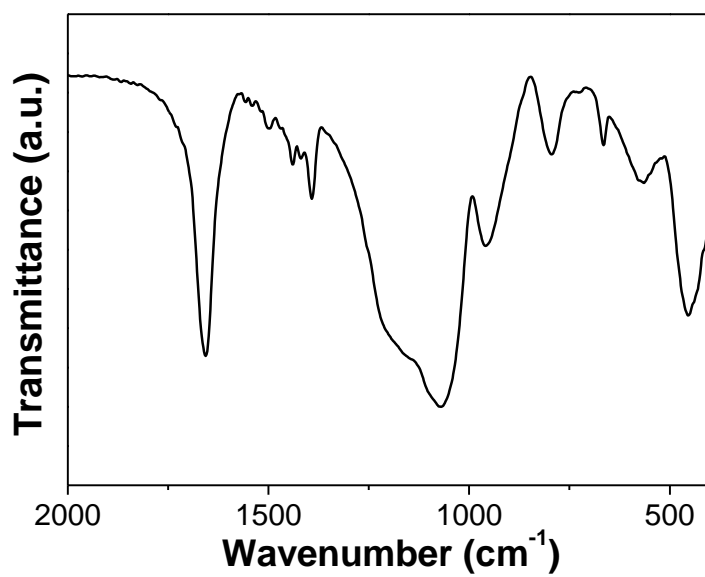

**Figure S1.** FT-IR spectrum of Sm-N-P-Gel.

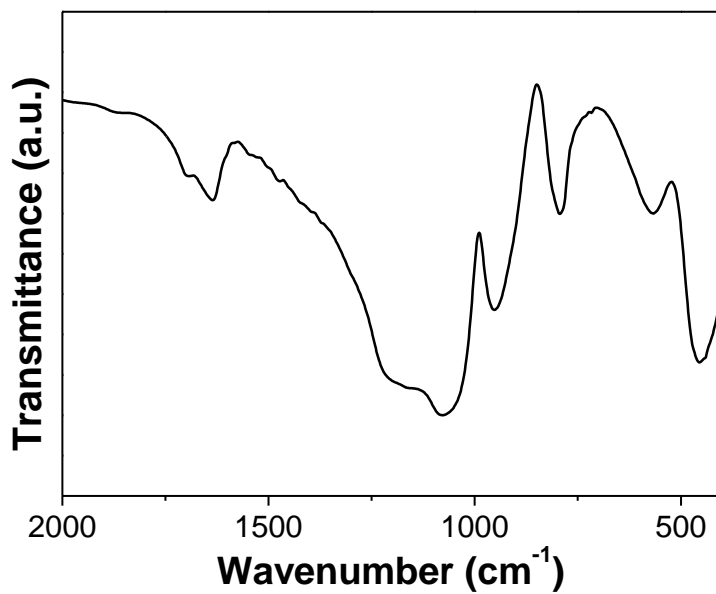

**Figure S2.** FT-IR spectrum of Yb-N-P-Gel.

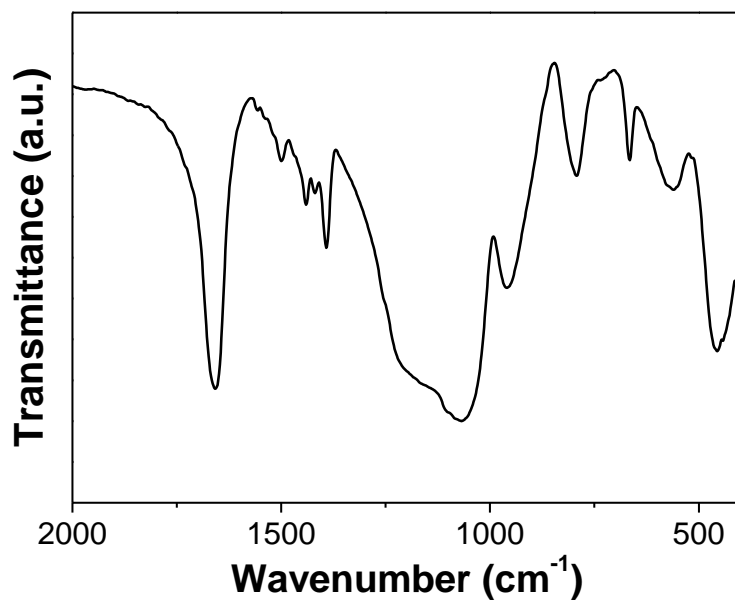

**Figure S3.** FT-IR spectrum of Nd-N-P-Gel.

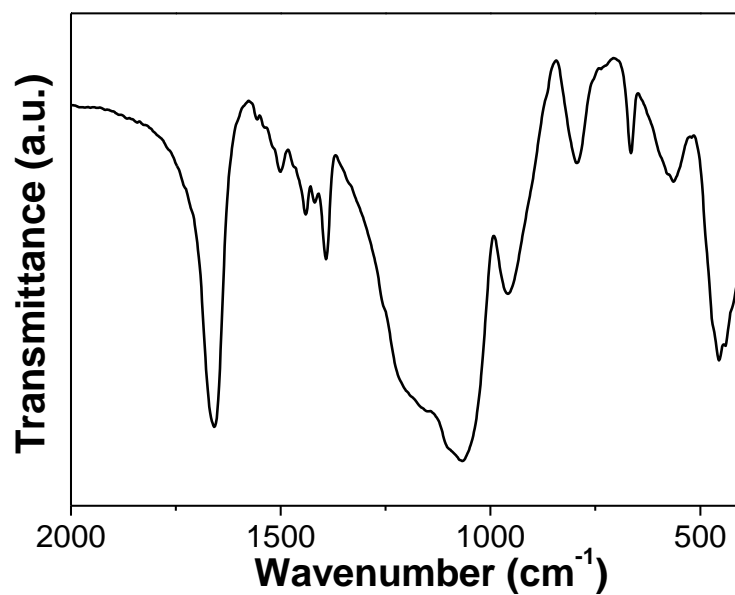

**Figure S4.** FT-IR spectrum of Ho-N-P-Gel.

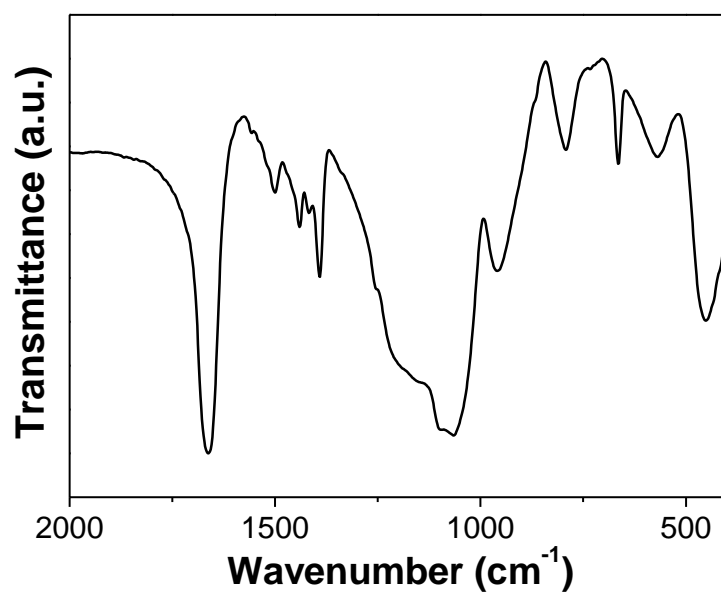

**Figure S5.** FT-IR spectrum of Tm-N-P-Gel.

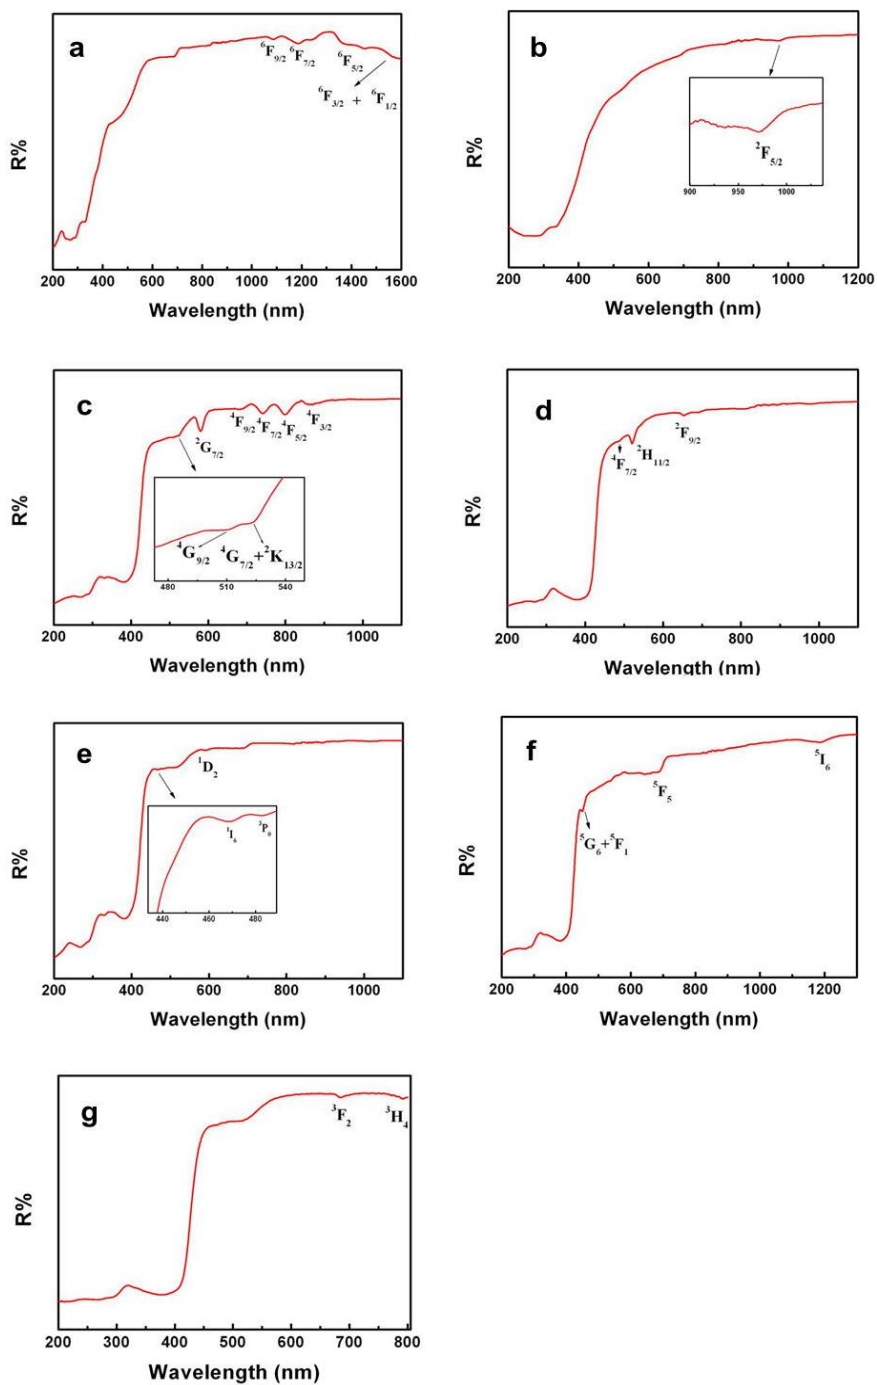

**Figure S6.** DR spectra of (a) Sm-N-P-Gel, (b) Yb-N-P-Gel, (c) Nd-N-P-Gel (d) Er-N-P-Gel, (e) Pr-N-P-Gel (f) Ho-N-P-Gel and (g) Tm-N-P-Gel.

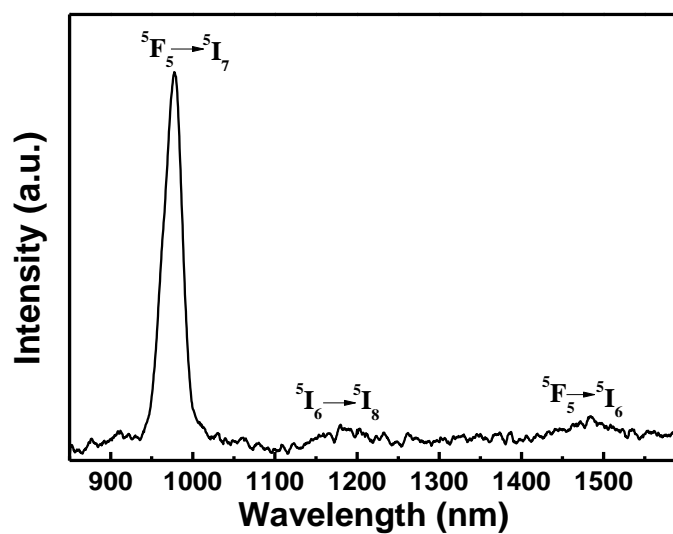

Figure S7. Emission ( $\lambda_{\text{ex}} = 401$  nm) spectrum for the Ho-N-P-Gel material.

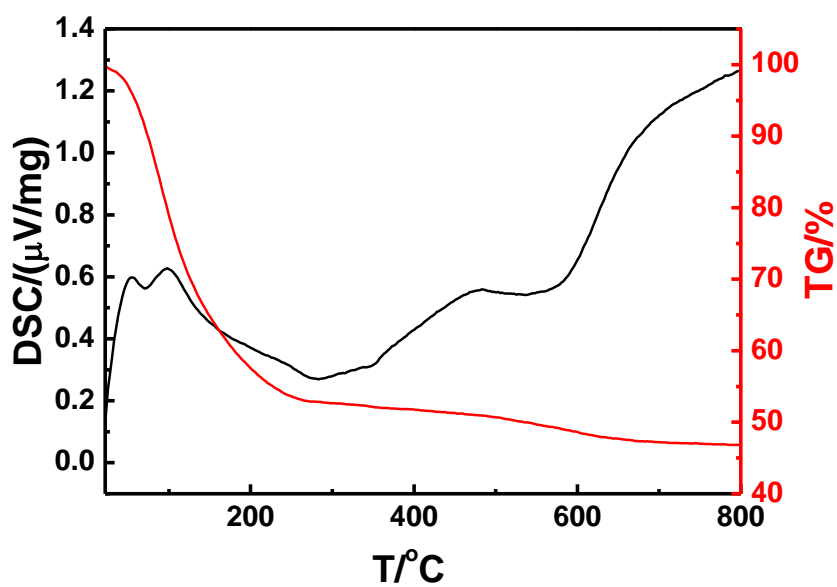

Figure S8. The TG and DSC curves of Sm-N-P-Gel material.

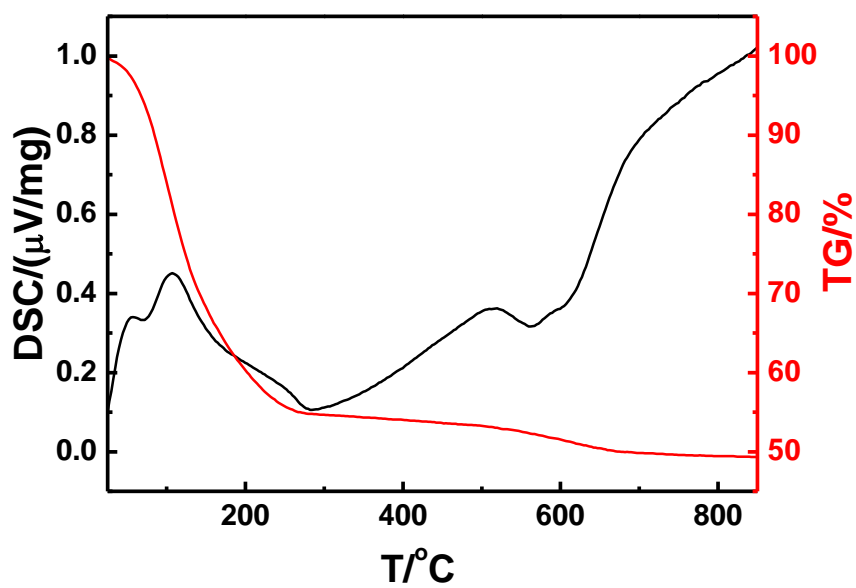

Figure S9. The TG and DSC curves of Yb-N-P-Gel material.

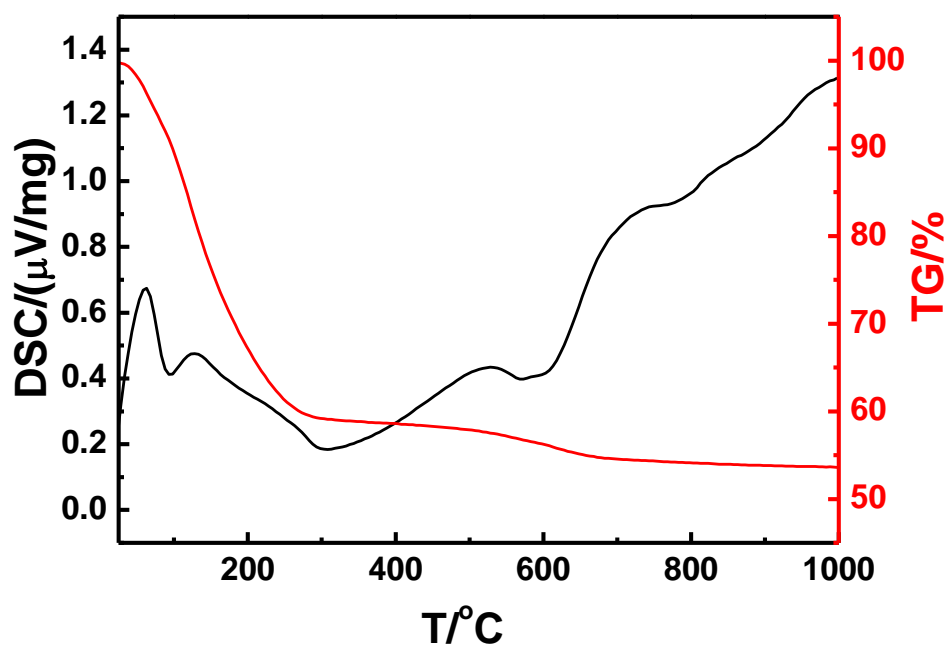

Figure S10. The TG and DSC curves of Er-N-P-Gel material.

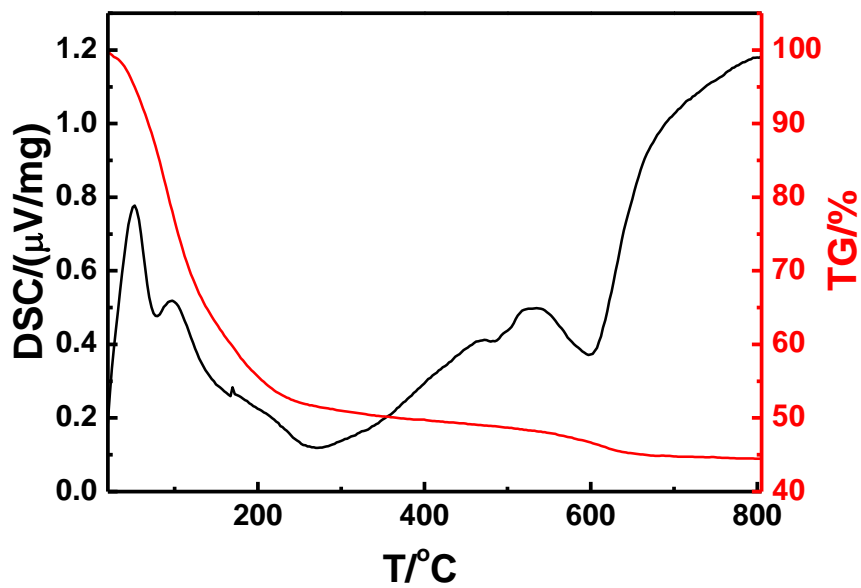

Figure S11. The TG and DSC curves of Pr-N-P-Gel material.

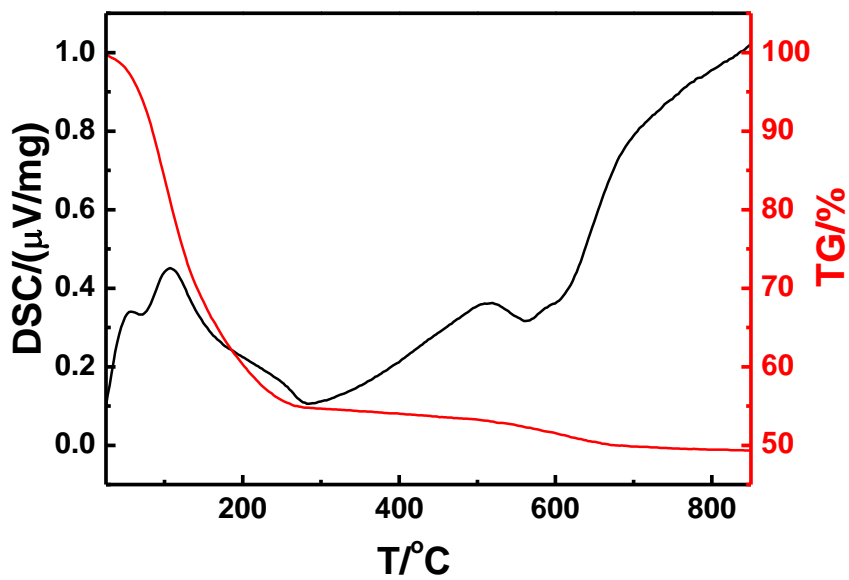

Figure S12. The TG and DSC curves of Ho-N-P-Gel material.



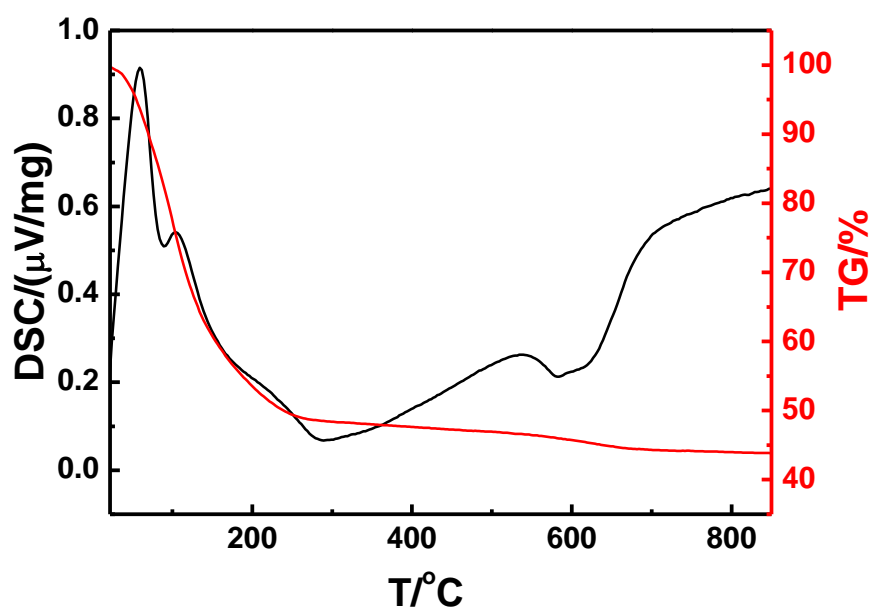

**Figure S13.** The TG and DSC curves of Tm-N-P-Gel material.
